# Supplementary material for: Magnetic resonance diffusion tensor imaging applied to rat model of contrast-induced acute kidney injury
Source: PeerJ. 2021 Feb 15;9:e10620. doi: 10.7717/peerj.10620 (PMC7891085; doi:10.7717/peerj.10620)
Supplement: Supplemental Information 1 — FA: fractional anisotropy; CO: cortex; OM: outer medulla. [file peerj-09-10620-s001.xlsx]

## Sheet: Sheet1
CO					OM
	1h	1d	5d			1h	1d	5d
Group 2	0.252	0.235	0.29		Group 2	0.387	0.488	0.528
	0.245	0.256	0.295			0.393	0.481	0.457
	0.233	0.279	0.299			0.396	0.478	0.531
	0.24	0.251	0.287			0.395	0.48	0.54
	0.211	0.273	0.291			0.4	0.486	0.496
Mean	0.2362	0.2588	0.2924		Mean	0.3942	0.4826	0.5104
Standard Deviation	0.0157067	0.0176409	0.00466905		Standard Deviation	0.00476445	0.004219	0.0341658
Group 1	0.301	0.286	0.303		Group 1	0.428	0.52	0.575
	0.295	0.299	0.277			0.445	0.549	0.572
	0.296	0.287	0.24			0.45	0.532	0.571
	0.249	0.298	0.323			0.418	0.516	0.568
	0.278	0.28	0.326			0.422	0.495	0.57
Mean	0.2838	0.29	0.2938		Mean	0.4326	0.5224	0.5712
Standard Deviation	0.0213002	0.00821584	0.0358845		Standard Deviation	0.0141704	0.0199825	0.00258844
Control group	0.324	0.31	0.317		Control group	0.593	0.605	0.587
	0.274	0.292	0.288			0.572	0.597	0.598
	0.312	0.299	0.304			0.58	0.608	0.592
	0.296	0.296	0.281			0.595	0.592	0.604
	0.331	0.316	0.337			0.601	0.586	0.595
Mean	0.3074	0.3026	0.3054		Mean	0.5882	0.5976	0.5952
Standard Deviation	0.0229085	0.0100399	0.0225455		Standard Deviation	0.0118617	0.00907193	0.00637966
