# Supplementary material for: Magnetic resonance diffusion tensor imaging applied to rat model of contrast-induced acute kidney injury
Source: PeerJ. 2021 Feb 15;9:e10620. doi: 10.7717/peerj.10620 (PMC7891085; doi:10.7717/peerj.10620)
Supplement: Supplemental Information 2 — ADC: apparent diffusion coefficient; CO: cortex; OM: outer medulla. [file peerj-09-10620-s002.xlsx]

## Sheet: Sheet1
CO					OM
	1h	1d	5d			1h	1d	5d
Group 2	0.00194	0.00207	0.00213		Group 2	0.00176	0.00218	0.00222
	0.00175	0.00209	0.00223			0.00162	0.00193	0.00249
	0.00192	0.00231	0.002688			0.00197	0.00222	0.00216
	0.00207	0.00229	0.002576			0.00196	0.00228	0.00239
	0.00216	0.00235	0.002393			0.00159	0.00187	0.00218
Mean	0.001968	0.002222	0.0024034		Mean	0.00178	0.002096	0.002288
Standard Deviation	0.000156429	0.000131605	0.000232224		Standard Deviation	0.000180693	0.000183657	0.00014481
Group 1	0.00218	0.00225	0.00239		Group 1	0.00208	0.00239	0.00279
	0.00209	0.00249	0.00249			0.00198	0.00227	0.00234
	0.00229	0.00276	0.00254			0.00244	0.00241	0.00251
	0.00218	0.00217	0.00228			0.00215	0.00218	0.00204
	0.00235	0.00218	0.00236			0.00182	0.00219	0.00227
Mean	0.002218	0.00237	0.002412		Mean	0.002094	0.002288	0.00239
Standard Deviation	0.000102323	0.000253476	0.000103779		Standard Deviation	0.000229739	0.000108259	0.000280089
Control group	0.00225	0.00232	0.00233		Control group	0.00253	0.00246	0.00202
	0.00243	0.00245	0.00231			0.0023	0.00225	0.00262
	0.00241	0.00219	0.00236			0.00231	0.002578	0.00249
	0.00247	0.00296	0.00244			0.00203	0.0025	0.002224
	0.00275	0.00279	0.00267			0.0027	0.00227	0.00257
Mean	0.002462	0.002542	0.002422		Mean	0.002374	0.0024116	0.0023848
Standard Deviation	0.000181439	0.000323218	0.000147207		Standard Deviation	0.000254224	0.000144923	0.000254765
